# Supplementary material for: Dietary intake of total, animal, and plant proteins and risk of all cause, cardiovascular, and cancer mortality: systematic review and dose-response meta-analysis of prospective cohort studies
Source: PubMed Central journal article supplement (PMC7374797; doi:10.1136/bmj.m2412), 2020-07-22
Supplement: nags054297.ww.pdf [file nags054297.ww.pdf]

## Online Supporting Material

**Supplemental Table 1:** Medical subject headings (MeSH) and non-MeSH keywords used to search relevant publications

|                  |                                                                                                                                                                                                                                                                                                                                                                                                                                                                                                                                                                                                             |
|------------------|-------------------------------------------------------------------------------------------------------------------------------------------------------------------------------------------------------------------------------------------------------------------------------------------------------------------------------------------------------------------------------------------------------------------------------------------------------------------------------------------------------------------------------------------------------------------------------------------------------------|
| <b>Concept 1</b> | "dietary protein"[tiab] OR "protein intake"[tiab] OR "plant protein"[tiab] OR "animal protein"[tiab] OR "protein consumption"[tiab] OR "Plant Proteins, Dietary"[Mesh] OR "Dietary Proteins"[Mesh] OR "Fish Proteins, Dietary"[Mesh] OR "Grain Proteins"[Mesh]                                                                                                                                                                                                                                                                                                                                              |
| <b>Concept 2</b> | "Mortality"[tiab] OR "Death"[tiab] OR "fatal"[tiab] OR "Survival"[tiab] OR "Mortality" [Subheading] OR "Neoplasms"[tiab] OR "Cancer Survivors"[tiab] OR "cardiovascular diseases"[tiab] OR "coronary disease"[tiab] OR "Myocardial Ischemia"[tiab] OR "coronary artery disease"[tiab] OR "myocardial infarction"[tiab] OR stroke[tiab] OR mortality[Mesh] OR death[Mesh] OR "Neoplasms"[Mesh] OR "Cancer Survivors"[Mesh] OR "cardiovascular diseases"[Mesh] OR "coronary disease"[Mesh] OR "Myocardial Ischemia"[Mesh] OR "coronary artery disease"[Mesh] OR "myocardial infarction"[Mesh] OR stroke[Mesh] |

The combination of keywords as mentioned above was used to search online databases.

("concept 1" AND "concept 2")

## Online Supporting Material

**Supplemental Table 2:** Results of risk of bias assessment based on the ROBINS-E tool

| Author                   | Bias due to confounding | Bias in selection of participants into the study | Bias in classification of exposures | Bias due to departures from intended exposures | Bias due to missing data | Bias in measurement of outcomes | Bias in selection of the reported result | Overall judgment |
|--------------------------|-------------------------|--------------------------------------------------|-------------------------------------|------------------------------------------------|--------------------------|---------------------------------|------------------------------------------|------------------|
| Virtanen et al. 2019     | Low                     | Low                                              | Low                                 | Low                                            | Low                      | Low                             | Low                                      | Low              |
| Alonso et al. 2015       | Low                     | Low                                              | Low                                 | Low                                            | Low                      | Low                             | Low                                      | Low              |
| Song et al. 2016         | Low                     | Low                                              | Low                                 | Low                                            | Low                      | Low                             | Low                                      | Low              |
| Zaslavsky et al. 2017    | Low                     | Low                                              | Low                                 | Low                                            | Low                      | Low                             | Low                                      | Low              |
| Dehghan et al. 2017      | Low                     | Low                                              | Low                                 | Low                                            | Low                      | Low                             | Low                                      | Low              |
| Courand et al. 2016      | Moderate                | Low                                              | Low                                 | Low                                            | Low                      | Low                             | Low                                      | Moderate         |
| Argos et al. 2013        | Low                     | Low                                              | Low                                 | Low                                            | Low                      | Low                             | Low                                      | Low              |
| Kelemen et al. 2005      | Low                     | Low                                              | Low                                 | Low                                            | Low                      | Low                             | Low                                      | Low              |
| Payette et al. 1999      | Critical                | Moderate                                         | Moderate                            | Moderate                                       | Low                      | Low                             | Low                                      | Critical         |
| Papanikolaou et al. 2019 | NI                      | Low                                              | Low                                 | NI                                             | NI                       | Low                             | Low                                      | Low              |
| Sun et al. 2019          | NI                      | Low                                              | Low                                 | NI                                             | NI                       | Low                             | Low                                      | Low              |
| Levine et al. 2014       | Low                     | Low                                              | Low                                 | Low                                            | Low                      | Low                             | Low                                      | Low              |
| Budhathoki et al. 2019   | Low                     | Low                                              | Low                                 | Low                                            | Low                      | Low                             | Low                                      | Low              |
| Halbesma et al. 2009     | Moderate                | Low                                              | Low                                 | Low                                            | Low                      | Low                             | Low                                      | Moderate         |
| Holmes et al. 1999       | Low                     | Low                                              | Low                                 | Low                                            | Low                      | Low                             | Low                                      | Low              |
| Mendonca et al. 2019     | Moderate                | Moderate                                         | Moderate                            | NI                                             | Low                      | Low                             | Low                                      | Moderate         |
| Chan et al. 2019         | Low                     | low                                              | Low                                 | Low                                            | Low                      | Low                             | Moderate                                 | Moderate         |
| Dwyer et al. 1994        | Serious                 | Low                                              | Low                                 | Moderate                                       | Low                      | Low                             | Moderate                                 | Serious          |
| Song et al. 2019         | Low                     | Low                                              | Low                                 | Low                                            | Low                      | Low                             | Low                                      | Low              |
| Bates et al. 2010        | Serious                 | Low                                              | Low                                 | Moderate                                       | Low                      | Low                             | Low                                      | Serious          |
| Kuijpers et al. 2015     | Low                     | Low                                              | Low                                 | Low                                            | Moderate                 | Low                             | Low                                      | Moderate         |
| Peis et al. 2010         | Low                     | Low                                              | Low                                 | Low                                            | Low                      | Low                             | Low                                      | Low              |
| Sauvaget et al. 2004     | Moderate                | Low                                              | Low                                 | Low                                            | Low                      | Low                             | Low                                      | Moderate         |
| Nagata et al. 2015       | Low                     | Low                                              | Low                                 | Low                                            | Low                      | Low                             | Moderate                                 | Moderate         |
| Esrey et al. 1996        | Low                     | Low                                              | Low                                 | Low                                            | Low                      | Low                             | Moderate                                 | Moderate         |
| Smit et al. 2007         | Low                     | Low                                              | Low                                 | Low                                            | Moderate                 | Low                             | Low                                      | Moderate         |
| Holmes et al. 2017       | Low                     | Low                                              | Low                                 | Low                                            | Moderate                 | Low                             | Low                                      | Moderate         |

|                      |          |          |     |          |     |     |     |          |
|----------------------|----------|----------|-----|----------|-----|-----|-----|----------|
| Borugian et al. 2004 | Moderate | Low      | Low | Moderate | Low | Low | Low | Moderate |
| Rohan et al. 1993    | Low      | Moderate | Low | Low      | Low | Low | Low | Moderate |
| Kurihara et al. 2018 | Moderate | Low      | Low | Low      | Low | Low | Low | Moderate |
| Palli et al. 2000    | Moderate | Moderate | Low | Moderate | Low | Low | Low | Moderate |
| Tharrey et al.2018   | Low      | Low      | Low | Low      | Low | Low | Low | Low      |

Abbreviations: NI: no information, ROBINS-E: risk of bias in non-randomized studies of exposures

The risk of bias in non-randomized studies of exposures (ROBINS-E) tool comprises 7 domains through which bias might be introduced. The questions of these domains include: (1) bias due to confounding, (2) bias in selection of participants into study, (3) bias in the classification of exposures, (4) bias due to departure from intended exposures, (5) bias due to missing data, (6) bias in the measurement of outcomes, and (7) bias in the selection of reported results. Studies were categorized as low risk, moderate risk, serious risk, and critical risk of bias under each domain.

**Supplemental Table 3:** Stratified analysis on associations of total, animal, and plant protein intakes with risk of mortality from all-cause, CVD, and cancer in adults aged  $\geq 18$  years

|                            | Total protein |                          |                                 |                | Animal protein |                          |                                 |                | Plant protein |                          |                                 |                |
|----------------------------|---------------|--------------------------|---------------------------------|----------------|----------------|--------------------------|---------------------------------|----------------|---------------|--------------------------|---------------------------------|----------------|
|                            | n             | ES (95% CI) <sup>1</sup> | I <sup>2</sup> (%) <sup>2</sup> | P <sup>3</sup> | n              | ES (95% CI) <sup>1</sup> | I <sup>2</sup> (%) <sup>2</sup> | P <sup>3</sup> | N             | ES (95% CI) <sup>1</sup> | I <sup>2</sup> (%) <sup>2</sup> | P <sup>3</sup> |
| <b>All-cause mortality</b> |               |                          |                                 |                |                |                          |                                 |                |               |                          |                                 |                |
| Location                   |               |                          |                                 |                |                |                          |                                 |                |               |                          |                                 |                |
| US                         | 6             | 0.99 (0.98 to 1.01)      | 60.1                            | 0.02           | 4              | 1.01 (1.00 to 1.03)      | 0                               | 0.53           | 5             | 0.97 (0.95 to 0.99)      | 76.7                            | 0.002          |
| Non US                     | 14            | 0.96 (0.90 to 1.02)      | 58.2                            | 0.002          | 7              | 0.98 (0.91 to 1.05)      | 57.9                            | 0.01           | 8             | 0.88 (0.82 to 0.95)      | 0                               | 0.45           |
| Sex                        |               |                          |                                 |                |                |                          |                                 |                |               |                          |                                 |                |
| Male and female            | 12            | 0.99 (0.97 to 1.01)      | 52.2                            | 0.01           | 6              | 1.01 (1.00 to 1.02)      | 62.6                            | 0.02           | 7             | 0.97 (0.96 to 0.99)      | 69.9                            | 0.003          |
| Male                       | 4             | 1.06 (0.93 to 1.20)      | 58.6                            | 0.06           | 4              | 1.03 (0.89 to 1.18)      | 39.5                            | 0.17           | 4             | 1.02 (0.86 to 1.20)      | 0                               | 0.83           |
| Female                     | 7             | 0.78 (0.68 to 0.89)      | 41.5                            | 0.11           | 3              | 0.91 (0.74 to 1.13)      | 24.9                            | 0.26           | 4             | 0.91 (0.87 to 0.95)      | 24.7                            | 0.26           |
| Follow-up duration         |               |                          |                                 |                |                |                          |                                 |                |               |                          |                                 |                |
| >15 years                  | 6             | 1.00 (0.98 to 1.02)      | 0                               | 0.64           | 6              | 1.01 (1.00 to 1.03)      | 0                               | 0.50           | 7             | 0.97 (0.95 to 0.98)      | 67.7                            | 0.003          |
| <15 years                  | 15            | 0.86 (0.80 to 0.92)      | 54.3                            | 0.005          | 5              | 0.83 (0.72 to 0.97)      | 52.4                            | 0.06           | 6             | 0.89 (0.80 to 0.99)      | 32.4                            | 0.18           |
| Dietary assessment tools:  |               |                          |                                 |                |                |                          |                                 |                |               |                          |                                 |                |
| FFQ                        | 13            | 0.96 (0.93 to 0.99)      | 49.8                            | 0.01           | 7              | 1.01 (0.97 to 1.05)      | 46.1                            | 0.06           | 8             | 0.90 (0.87 to 0.93)      | 0                               | 0.46           |
| Food recall and record     | 6             | 1.00 (0.98 to 1.02)      | 57.7                            | 0.03           | 4              | 1.01 (1.00 to 1.03)      | 57.5                            | 0.07           | 5             | 0.99 (0.97 to 1.01)      | 9                               | 0.35           |
| Adjustment for energy      |               |                          |                                 |                |                |                          |                                 |                |               |                          |                                 |                |
| Yes                        | 16            | 0.97 (0.94 to 1.00)      | 50.9                            | 0.007          | 9              | 1.01 (0.97 to 1.06)      | 39                              | 0.08           | 9             | 0.90 (0.85 to 0.94)      | 0                               | 0.46           |
| No                         | 4             | 0.81 (0.69 to 0.95)      | 67.6                            | 0.02           | 1              | 0.45 (0.23 to 0.89)      | -                               | -              | 2             | 0.87 (0.76 to 1.00)      | 0                               | 0.45           |
| Unclear                    | 1             | 1.00 (0.99 to 1.02)      | -                               | -              | 1              | 1.01 (1.00 to 1.03)      | -                               | -              | 2             | 0.98 (0.96 to 1.00)      | 89.4                            | 0.002          |
| Adjustment for BMI         |               |                          |                                 |                |                |                          |                                 |                |               |                          |                                 |                |
| Yes                        | 15            | 0.97 (0.94 to 1.00)      | 58.7                            | 0.001          | 9              | 1.01 (0.97 to 1.05)      | 53.7                            | 0.01           | 10            | 0.90 (0.86 to 0.94)      | 0                               | 0.51           |
| No                         | 5             | 0.91 (0.82 to 1.00)      | 51.7                            | 0.04           | 1              | 1.09 (0.83 to 1.44)      | -                               | -              | 1             | 0.82 (0.62 to 1.09)      | -                               | -              |
| Unclear                    | 1             | 1.00 (0.99 to 1.02)      | -                               | -              | 1              | 1.01 (1.00 to 1.03)      | -                               | -              | 2             | 0.98 (0.96 to 1.00)      | 89.4                            | 0.002          |
| Health status              |               |                          |                                 |                |                |                          |                                 |                |               |                          |                                 |                |
| Healthy                    | 15            | 0.99 (0.97 to 1.01)      | 51.7                            | 0.01           | 9              | 1.01 (1.00 to 1.02)      | 33.3                            | 0.13           | 11            | 0.97 (0.95 to 0.98)      | 60.5                            | 0.001          |
| Unhealthy                  | 6             | 0.81 (0.70 to 0.95)      | 62.6                            | 0.02           | 2              | 0.91 (0.72 to 1.16)      | 84                              | 0.01           | 2             | 0.91 (0.71 to 1.17)      | 57.9                            | 0.12           |
| Adjustment for fat and CHO |               |                          |                                 |                |                |                          |                                 |                |               |                          |                                 |                |
| Yes                        | 7             | 0.99 (0.96 to 1.03)      | 0                               | 0.49           | 6              | 1.02 (0.98 to 1.06)      | 48.8                            | 0.06           | 7             | 0.89 (0.85 to 0.94)      | 0                               | 0.78           |
| No                         | 13            | 0.83 (0.77 to 0.90)      | 47.3                            | 0.02           | 4              | 0.88 (0.75 to 1.03)      | 42.3                            | 0.14           | 4             | 0.90 (0.76 to 1.06)      | 38.7                            | 0.16           |
| Unclear                    | 1             | 1.00 (0.98 to 1.02)      | -                               | -              | 1              | 1.01 (1.00 to 1.03)      | -                               | -              | 2             | 0.98 (0.96 to 1.00)      | 89.4                            | 0.002          |
| High-income country        |               |                          |                                 |                |                |                          |                                 |                |               |                          |                                 |                |
| Yes                        | 19            | 0.99 (0.97 to 1.01)      | 59.5                            | <0.001         | 11             | 1.01 (1.00 to 1.02)      | 45.2                            | 0.03           | 13            | 0.97 (0.95 to 0.98)      | 57.5                            | 0.003          |
| No                         | 1             | 1.07 (0.85 to 1.35)      | -                               | -              | 0              | -                        | -                               | -              | 0             | -                        | -                               | -              |

|                              |    |                     |      |       |    |                     |      |      |    |                     |      |        |  |
|------------------------------|----|---------------------|------|-------|----|---------------------|------|------|----|---------------------|------|--------|--|
| Assessment of protein intake |    |                     |      |       |    |                     |      |      |    |                     |      |        |  |
| Single measurement           | 20 | 0.99 (0.97 to 1.01) | 60.1 | 0.001 | 10 | 1.01 (0.99 to 1.02) | 48.2 | 0.03 | 12 | 0.97 (0.95 to 0.99) | 51.5 | 0.01   |  |
| Repeated measurements        | 1  | 0.98 (0.94 to 1.02) | -    | -     | 1  | 1.03 (0.98 to 1.08) | -    | -    | 1  | 0.89 (0.83 to 0.95) | -    | -      |  |
| Effect size type             |    |                     |      |       |    |                     |      |      |    |                     |      |        |  |
| HR                           | 17 | 0.99 (0.97 to 1.01) | 58.5 | 0.001 | 9  | 1.01 (1.00 to 1.02) | 50.8 | 0.02 | 11 | 0.97 (0.95 to 0.98) | 63   | 0.001  |  |
| RR                           | 3  | 0.90 (0.75 to 1.09) | 59.5 | 0.06  | 1  | 0.82 (0.59 to 1.13) | -    | -    | 1  | 0.95 (0.82 to 1.10) | -    | -      |  |
| OR                           | 1  | 1.32 (0.81 to 2.16) | -    | -     | 1  | 1.01 (0.52 to 1.96) | -    | -    | 1  | 1.19 (0.66 to 2.14) | -    | -      |  |
| <b>CVD mortality</b>         |    |                     |      |       |    |                     |      |      |    |                     |      |        |  |
| Location                     |    |                     |      |       |    |                     |      |      |    |                     |      |        |  |
| US                           | 3  | 1.01 (0.99 to 1.02) | 0    | 0.61  | 3  | 1.01 (1.00 to 1.03) | 19.7 | 0.28 | 4  | 0.98 (0.96 to 1.01) | 82.5 | 0.001  |  |
| Non US                       | 6  | 0.92 (0.81 to 1.04) | 24.1 | 0.23  | 5  | 0.98 (0.84 to 1.15) | 43.1 | 0.10 | 6  | 0.83 (0.75 to 0.93) | 0    | 0.73   |  |
| Sex                          |    |                     |      |       |    |                     |      |      |    |                     |      |        |  |
| Male and female              | 7  | 1.01 (0.99 to 1.02) | 48.1 | 0.07  | 5  | 1.01 (1.00 to 1.03) | 63.2 | 0.02 | 6  | 0.98 (0.96 to 1.01) | 73.4 | 0.002  |  |
| Male                         | 2  | 0.95 (0.71 to 1.26) | 0    | 0.39  | 2  | 0.98 (0.68 to 1.41) | 13.5 | 0.28 | 2  | 0.90 (0.62 to 1.32) | 0    | 0.93   |  |
| Female                       | 3  | 0.95 (0.73 to 1.25) | 0    | 0.76  | 3  | 1.10 (0.78 to 1.55) | 0    | 0.64 | 4  | 0.85 (0.78 to 0.93) | 0    | 0.63   |  |
| Follow-up time               |    |                     |      |       |    |                     |      |      |    |                     |      |        |  |
| >15 years                    | 5  | 1.01 (0.99 to 1.02) | 0    | 0.95  | 5  | 1.01 (1.00 to 1.03) | 0    | 0.57 | 6  | 0.98 (0.96 to 1.00) | 76.1 | <0.001 |  |
| <15 years                    | 5  | 0.82 (0.69 to 0.98) | 24.9 | 0.24  | 3  | 0.78 (0.54 to 1.13) | 59.5 | 0.06 | 4  | 0.87 (0.77 to 0.99) | 0    | 0.67   |  |
| Dietary assessment tools     |    |                     |      |       |    |                     |      |      |    |                     |      |        |  |
| FFQ                          | 8  | 0.97 (0.91 to 1.02) | 0    | 0.79  | 6  | 1.07 (0.99 to 1.16) | 0    | 0.56 | 7  | 0.86 (0.81 to 0.91) | 0    | 0.68   |  |
| Food recall and record       | 2  | 1.01 (0.99 to 1.02) | 82.3 | 0.01  | 2  | 1.01 (0.99 to 1.02) | 81.8 | 0.01 | 3  | 1.00 (0.97 to 1.02) | 55.6 | 0.10   |  |
| Adjustment for energy        |    |                     |      |       |    |                     |      |      |    |                     |      |        |  |
| Yes                          | 7  | 0.97 (0.92 to 1.03) | 0    | 0.90  | 6  | 1.07 (0.99 to 1.16) | 0    | 0.56 | 6  | 0.85 (0.78 to 0.92) | 0    | 0.60   |  |
| No                           | 2  | 0.68 (0.50 to 0.93) | 52.8 | 0.14  | 1  | 0.45 (0.23 to 0.89) | -    | -    | 2  | 0.87 (0.76 to 1.00) | 0    | 0.45   |  |
| Unclear                      | 1  | 1.01 (1.00 to 1.03) | -    | -     | 1  | 1.01 (1.00 to 1.03) | -    | -    | 2  | 0.99 (0.97 to 1.01) | 87.7 | 0.004  |  |
| Adjustment for BMI           |    |                     |      |       |    |                     |      |      |    |                     |      |        |  |
| Yes                          | 9  | 0.96 (0.91 to 1.02) | 4.6  | 0.39  | 7  | 1.06 (0.97 to 1.15) | 33.4 | 0.15 | 8  | 0.85 (0.79 to 0.91) | 0    | 0.72   |  |
| No                           | 0  | -                   | -    | -     | -  | -                   | -    | -    | -  | -                   | -    | -      |  |
| Unclear                      | 1  | 1.01 (1.00 to 1.03) | -    | -     | 1  | 1.01 (1.00 to 1.03) | -    | -    | 2  | 0.99 (0.97 to 1.01) | 87.7 | 0.004  |  |
| Health status                |    |                     |      |       |    |                     |      |      |    |                     |      |        |  |
| Healthy                      | 8  | 1.01 (0.99 to 1.02) | 0    | 0.43  | 7  | 1.01 (1.00 to 1.03) | 22.6 | 0.24 | 9  | 0.97 (0.95 to 0.99) | 66   | 0.001  |  |
| Unhealthy                    | 2  | 0.82 (0.60 to 1.14) | 62.9 | 0.10  | 1  | 2.54 (0.87 to 7.42) | -    | -    | 1  | 1.73 (0.56 to 5.33) | -    | -      |  |
| Unclear                      | 0  | -                   | -    | -     | -  | -                   | -    | -    | -  | -                   | -    | -      |  |
| Adjustment for fat and CHO   |    |                     |      |       |    |                     |      |      |    |                     |      |        |  |
| Yes                          | 5  | 0.98 (0.93 to 1.04) | 0    | 0.87  | 5  | 1.08 (0.99 to 1.17) | 0    | 0.50 | 6  | 0.85 (0.79 to 0.91) | 0    | 0.51   |  |
| No                           | 4  | 0.80 (0.67 to 0.96) | 2.4  | 0.39  | 2  | 0.67 (0.45 to 0.99) | 5.9  | 0.34 | 2  | 0.91 (0.61 to 1.35) | 0    | 0.66   |  |
| Unclear                      | 1  | 1.01 (0.99 to 1.02) | -    | -     | 1  | 1.01 (1.00 to 1.03) | -    | -    | 2  | 0.99 (0.97 to 1.01) | 87.7 | 0.004  |  |
| High-income country          |    |                     |      |       |    |                     |      |      |    |                     |      |        |  |
| Yes                          | 9  | 1.01 (0.99 to 1.02) | 18.8 | 0.26  | 8  | 1.01 (0.99 to 1.03) | 37.2 | 0.12 | 10 | 0.97 (0.95 to 0.99) | 63.7 | 0.001  |  |



|                              |    |                     |      |      |   |                     |     |      |   |                     |    |      |
|------------------------------|----|---------------------|------|------|---|---------------------|-----|------|---|---------------------|----|------|
| Assessment of protein intake |    |                     |      |      |   |                     |     |      |   |                     |    |      |
| Single measurement           | 11 | 1.00 (0.98 to 1.02) | 45   | 0.04 | 8 | 1.00 (0.97 to 1.02) | 5.7 | 0.38 | 8 | 1.01 (0.97 to 1.05) | 0  | 0.44 |
| Repeated measurements        | 1  | 0.98 (0.92 to 1.05) | -    | -    | 1 | 1.02 (0.94 to 1.11) | -   | -    | 1 | 0.92 (0.82 to 1.03) | -  | -    |
| Effect size type             |    |                     |      |      |   |                     |     |      |   |                     |    |      |
| HR                           | 8  | 1.00 (0.98 to 1.02) | 33.9 | 0.14 | 6 | 1.00 (0.98 to 1.02) | 0   | 0.47 | 6 | 1.00 (0.96 to 1.03) | 35 | 0.16 |
| RR                           | 3  | 0.91 (0.75 to 1.09) | 66.4 | 0.05 | 2 | 0.84 (0.69 to 1.02) | 0   | 0.72 | 2 | 1.07 (0.91 to 1.25) | 0  | 0.77 |
| OR                           | 1  | 1.32 (0.81 to 2.16) | -    | -    | 1 | 1.01 (0.52 to 1.96) | -   | -    | 1 | 1.19 (0.66 to 2.14) | -  | -    |

Abbreviation: ES: effect size- HR: hazard ratio- OR: odds ratio- RR: risk ratio- CI: confidence interval- FFQ: food frequency questionnaire- BMI: body mass index- US: united states- CVD: cardiovascular diseases, CHO: carbohydrate

<sup>1</sup>Obtained from the fixed-effects model; these effect sizes are for the highest versus lowest comparison

<sup>2</sup>Inconsistency- percentage of variation across studies due to heterogeneity

<sup>3</sup>Obtained from the Q-test.

### Online Supporting Material Supplemental Figure 1

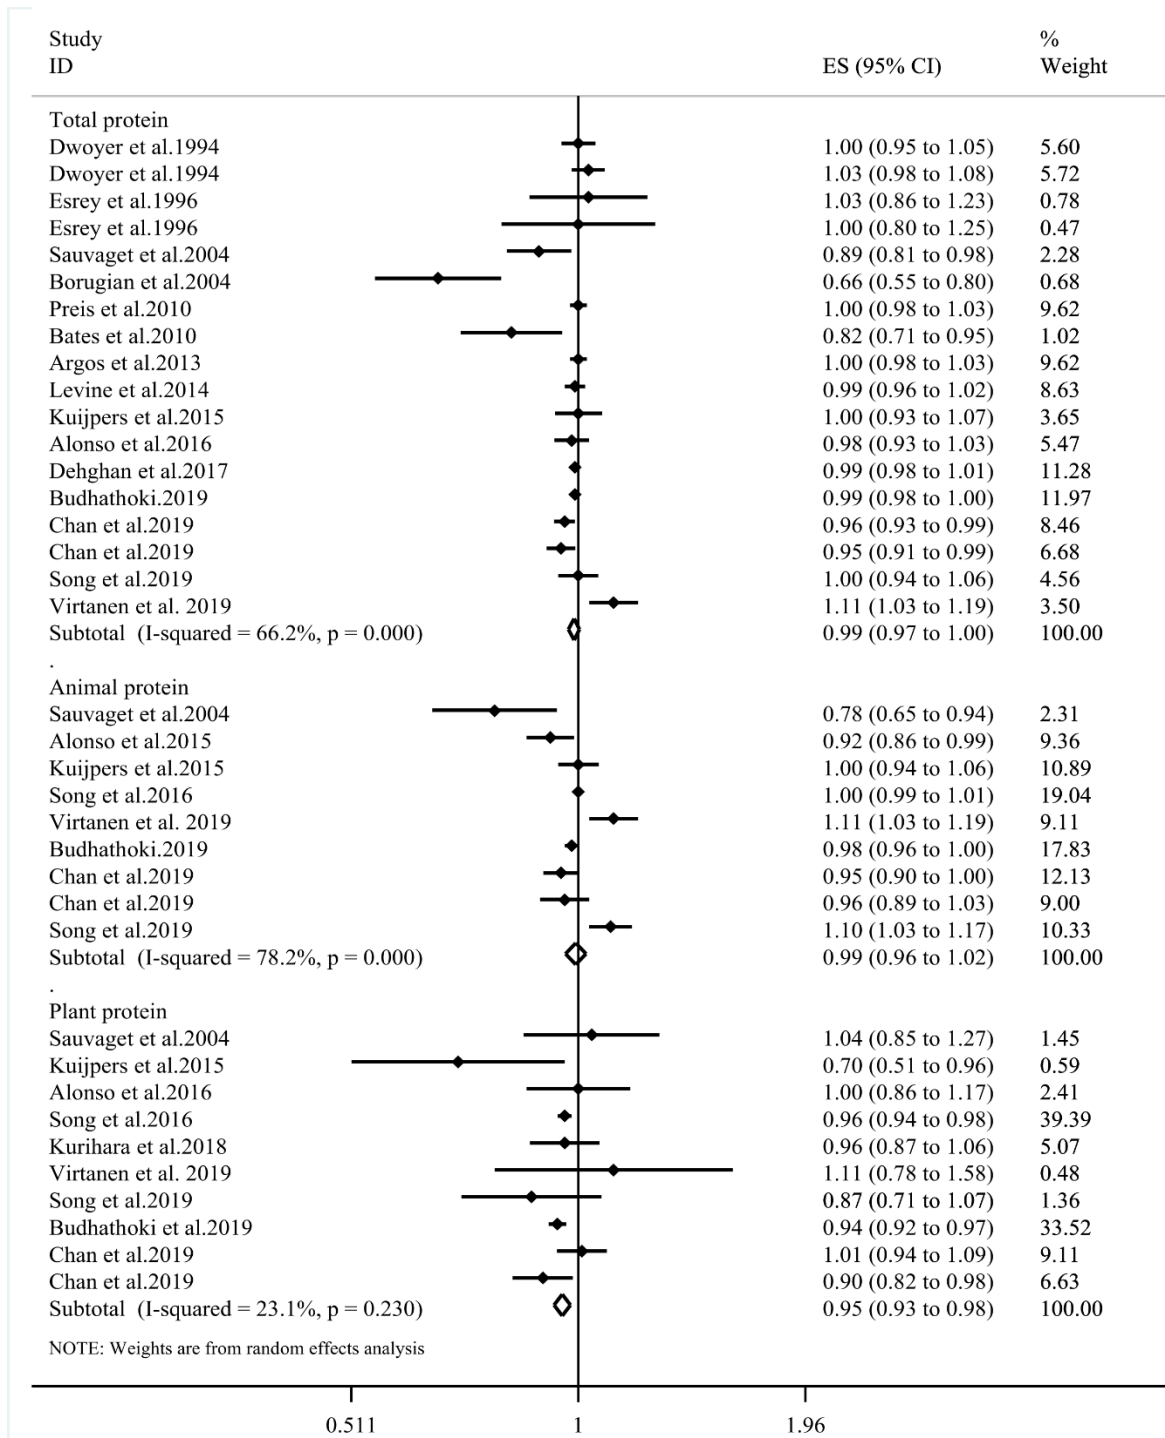

Forest plot for the risk of all-cause mortality based on 3% increase in energy from protein intake in adults aged >18 years. Horizontal lines represent 95% CIs. Diamonds represent the pooled estimates from the random-effects analysis. ES: effect size, CI: confidence interval



**Online Supporting Material  
Supplemental Figure 2**

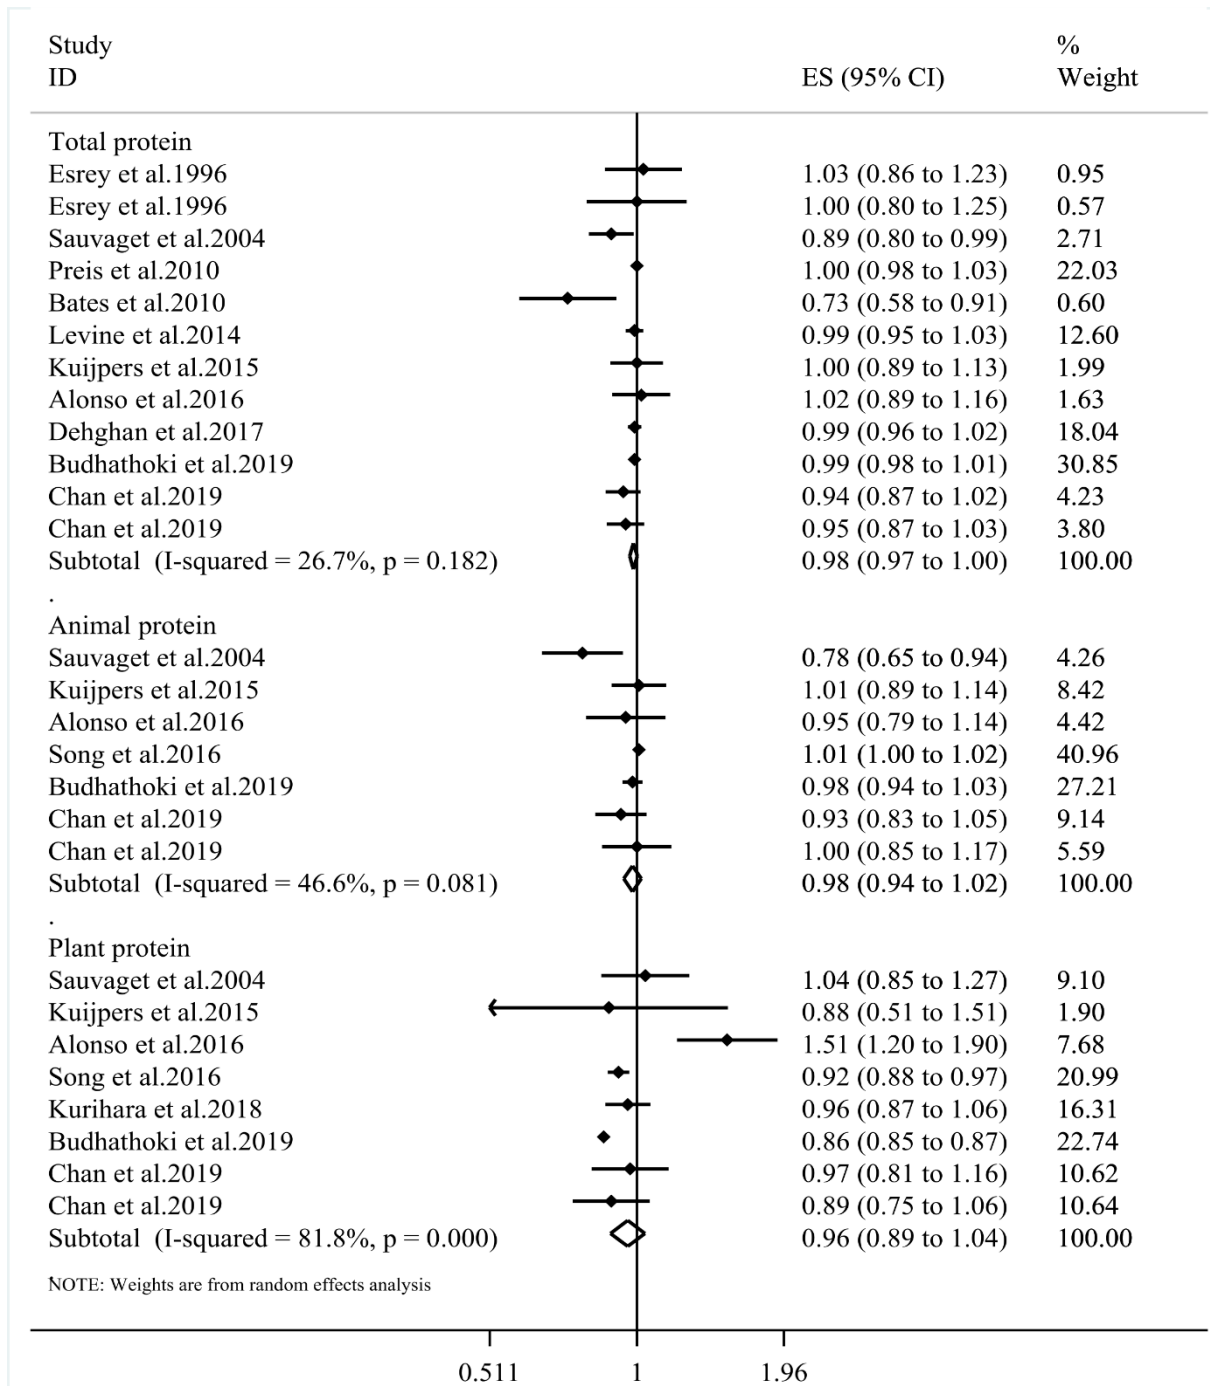

Forest plot for the risk of CVD mortality based on 3% increase in energy from protein intake in adults aged >18 years. Horizontal lines represent 95% CIs. Diamonds represent the pooled estimates from the random-effects analysis. ES: effect size, CI: confidence interval

**Online Supporting Material  
Supplemental Figure 3**

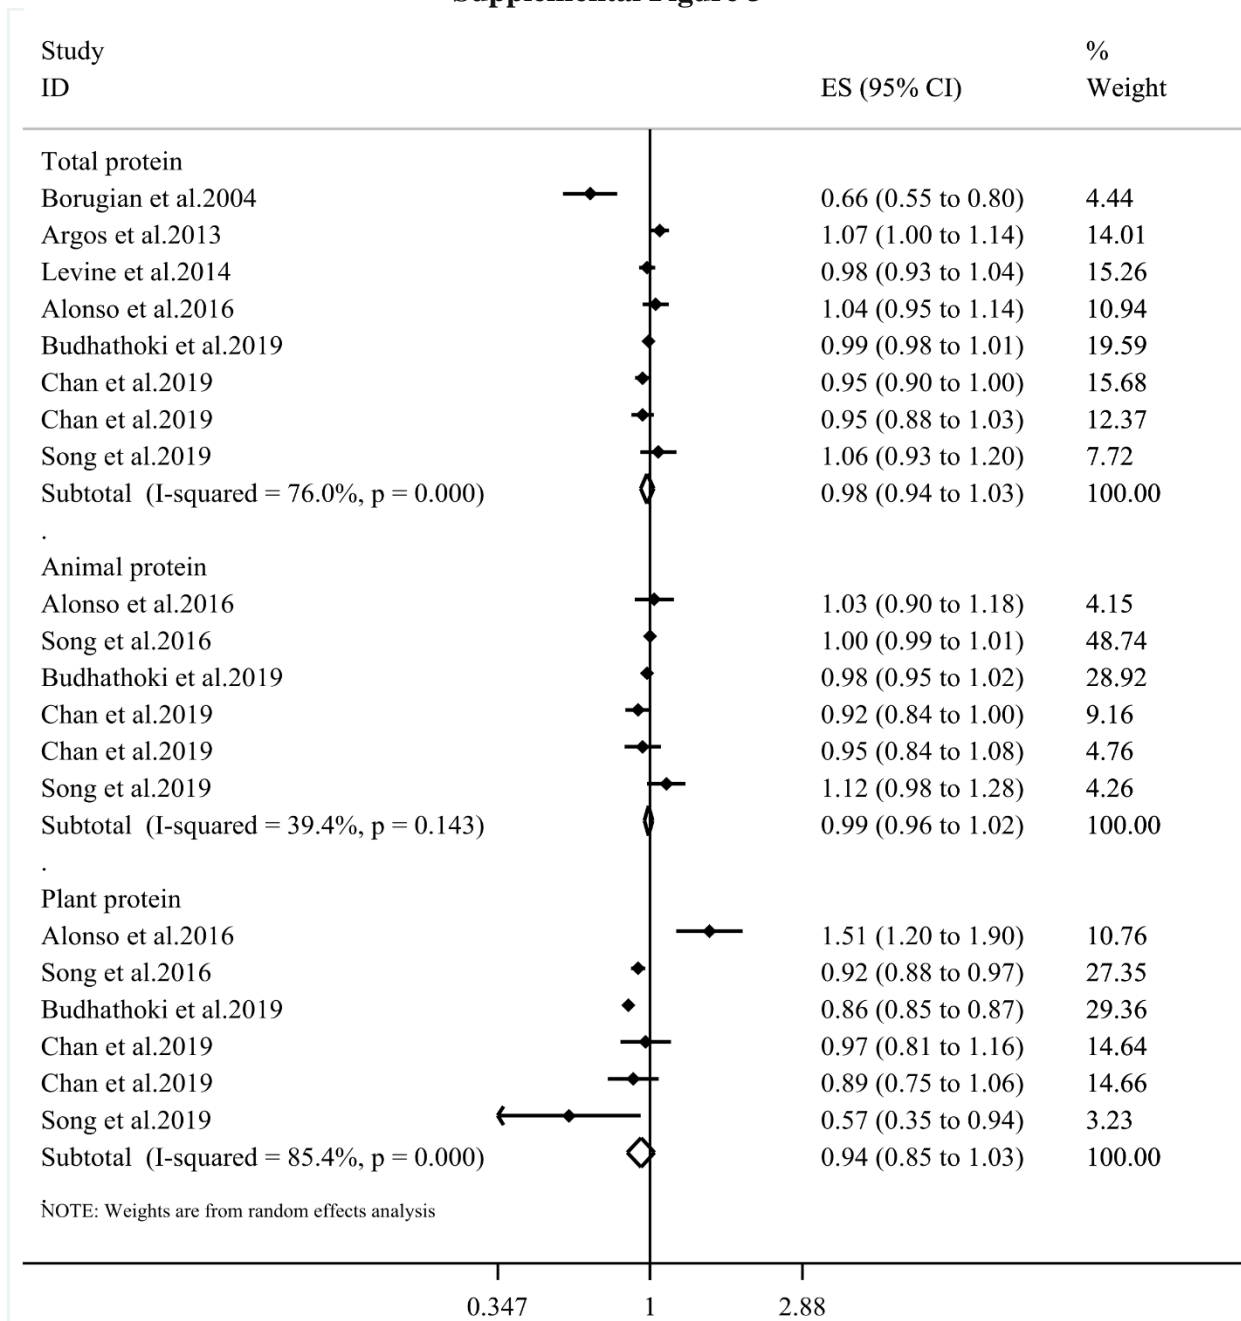

Forest plot for the risk of cancer mortality based on 3% increase in energy from protein intake in adults aged >18 years. Horizontal lines represent 95% CIs. Diamonds represent the pooled estimates from the random-effects analysis. ES: effect size, CI: confidence interval
